# Supplementary material for: Observation-constrained kinetic modeling of isoprene SOA formation in the atmosphere
Source: Copernicus journal article supplement (doi:10.5194/acp-24-6153-2024), 2024-05-28
Supplement: Supplementary file 1 [file acp-24-6153-2024-supplement.pdf]

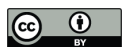

*Supplement of*

## **Observation-constrained kinetic modeling of isoprene SOA formation in the atmosphere**

**Chuanyang Shen et al.**

*Correspondence to:* Haofei Zhang ([haofei.zhang@ucr.edu](mailto:haofei.zhang@ucr.edu))

The copyright of individual parts of the supplement might differ from the article licence.

22 **Text S1:**

23 **Reactive uptake**

24 The reactive uptake coefficient (for epoxides, lactone, and alkylnitrates) can be described  
25 as the following equation:

26 
$$\frac{1}{\gamma} = \frac{r_p \omega}{4D_{gas}} + \frac{1}{\alpha} + \frac{1}{\Gamma_{aq}}$$

27 The  $\alpha$  is 0.02;  $D_{gas}$  is  $0.1 \text{ cm}^2 \text{ s}^{-1}$ ;  $\Gamma_{aq}$  is calculated from the following equation:

28 
$$\Gamma_{aq} = \frac{4VRTH_{aq}k_{aq}}{SA * \omega}$$

29 for IEPOX, the  $\omega$  is  $2.81 \times 10^4 \text{ cm s}^{-1}$ ; for HMML, the  $\omega$  is  $2.69 \times 10^8 \text{ cm s}^{-1}$ ; V is the total particle  
30 volume; R is the Universal gas constant of  $0.08205 \text{ L atm mol}^{-1} \text{ K}^{-1}$ ; for IEPOX,  $H_{aq}$  is  $1.3 \times 10^8$   
31  $\text{M atm}^{-1}$ ; for HMML,  $H_{aq}$  is estimated from EPI as  $3.76 \times 10^4 \text{ M atm}^{-1}$ . The  $k_{aq}$  is calculated as:

32 
$$k_{aq} = \sum_{i=1}^N \sum_{j=1}^M k_{i,j} [\text{nuc}_i] [\text{acid}_j]$$

33 [nuc] is the concentration of nucleophiles (M) and it can be either the water or sulfate, [acid] is  
34 the concentration of acids (M). All these parameters can be modeled using the ISORROPIA II.  
35  $a_{H^+}$  is the proton activity, and the  $k_{i,j}$  is shown in the Table S8. In the model, we assume that the  
36 reactive uptake of all epoxides follows the same reaction kinetics, that means the  $k_{i,H^+}$  and  
37  $k_{i,HSO_4^-}$  are the same for IEPOX, MGA and other epoxides. But the  $H_{aq}$  values are different given  
38 by the EPI estimation.

39 **Text S2:**

40 **The model setup for different chamber experiments**

41 **UNC-2010/2012:**

42 In UNC-2010/2012, a total of 23 experiments were performed at the University of North  
43 Carolina 270 m<sup>3</sup> dual outdoor smog chamber under clear natural sunlight. Overall, the initial  
44 NO<sub>x</sub>/isoprene ratios varied from 0.06 to 0.53, with initial isoprene concentration ranging from 200  
45 ppb to 1250 ppb. The concentrations of O<sub>3</sub>, NO<sub>x</sub> and isoprene were measured from the chamber  
46 and the experimental facility can be referred to in previous studies (Kamens et al., 2011; Zhang et  
47 al., 2011; Zhang et al., 2013). The experimental conditions for all these 23 experiments are  
48 summarized in Table S3. J values, temperature (T) and RH are derived from real-time  
49 measurements. The simulation is run in gas mode, which means only the gas-phase reactions are  
50 allowed.

51 **Kroll-2006:**

52 Kroll-2006 included 8 unseeded NO<sub>x</sub>-free experiments and 6 seeded high-NO<sub>x</sub> experiments.  
53 The initial isoprene concentration varied from 12.2 ppb to 90 ppb for NO<sub>x</sub>-free experiments. The  
54 initial NO<sub>x</sub>/isoprene ratios spanned a wide range from 1 to 16.9 with initial isoprene concentration  
55 around 45 ppb for high-NO<sub>x</sub> experiments. The input values are shown in Table S4. The chamber  
56 RH in the meteorology field is 50%. The J<sub>NO<sub>2</sub></sub>, J<sub>NO<sub>3</sub>NO</sub>, J<sub>NO<sub>3</sub>NO<sub>2</sub></sub>, and J<sub>H<sub>2</sub>O<sub>2</sub></sub> are 0.0048, 2×10<sup>-4</sup>,  
57 4.6×10<sup>-4</sup> and 2.9×10<sup>-6</sup> s<sup>-1</sup>, respectively (Thornton et al., 2020). Other J values are calculated from  
58 solar zenith angle (SZA=50) using MCM's solar zenith angle parameterization. The C\* threshold  
59 is set as 100 μg m<sup>-3</sup>, which means that species with C\* >100 μg m<sup>-3</sup> are excluded from contributing  
60 to SOA formation and species otherwise will go through gas-particle partitioning to form the SOA.  
61 Since the SOA measurements in our simulated chamber studies have been corrected for losses of

62 particles to walls, the model simulation does not include particle wall loss. For the vapor wall loss,  
63 it was treated based on Zhang et al. (2014). The threshold to invoke wall partitioning is  $1 \times 10^6 \mu\text{g}$   
64  $\text{m}^{-3}$ ; The equivalent absorbing organic mass concentration of the wall material is set as  $1 \times 10^4 \mu\text{g}$   
65  $\text{m}^{-3}$ ; and the timescale to mix vapors to wall surface is set as  $2.5 \times 10^{-4} \text{s}^{-1}$ .

66 **PNNL-2018:**

67 The initial concentrations include isoprene,  $\text{H}_2\text{O}_2$ , NO,  $\text{NO}_2$ . The input values are shown  
68 in Table S4. The chamber RH in the meteorology field is 5%. The  $J_{\text{NO}_2}$ ,  $J_{\text{NO}_3\text{NO}}$ ,  $J_{\text{NO}_3\text{NO}_2}$ , and  $J_{\text{H}_2\text{O}_2}$   
69 are 0.006,  $2 \times 10^{-4}$ ,  $4.6 \times 10^{-4}$  and  $2.2 \times 10^{-6} \text{s}^{-1}$ , respectively. Other J values are calculated from solar  
70 zenith angle (SZA=50). The  $C^*$  threshold is set as  $100 \mu\text{g m}^{-3}$ . No particle wall loss is included in  
71 the model simulation. A first-order rate coefficient for irreversible vapor wall loss of  $1 \times 10^{-4} \text{s}^{-1}$  is  
72 applied in the model.

73 **PNNL-2014:**

74 The initial concentrations include isoprene,  $\text{H}_2\text{O}_2$  and NO, which are shown in Table S4.  
75 The initial  $\text{NO}_x$ /isoprene ratios were 0-3.8. The  $J_{\text{NO}_2}$  and  $J_{\text{H}_2\text{O}_2}$  are  $0.006 \text{s}^{-1}$  and  $2.5 \times 10^{-6} \text{s}^{-1}$ ,  
76 respectively. SZA is set to 50 and is used to calculate other J values. The experiments were  
77 conducted in the continuous-flow steady-state mode in which reacts were continuously injected  
78 into the chamber and the total flow into and out of the chamber is balanced, so the dilution factor  
79 is set to  $5.6 \times 10^{-5} \text{s}^{-1}$  and continuous injections of isoprene,  $\text{H}_2\text{O}_2$  and NO into the chamber are  
80 included in the model. The  $C^*$  threshold is set as  $100 \mu\text{g m}^{-3}$ . Wall loss rate is set as  $6 \times 10^{-5} \text{s}^{-1}$ . A  
81 first-order rate coefficient for irreversible vapor wall loss of  $1 \times 10^{-4} \text{s}^{-1}$  is applied in the model  
82 (Thornton et al., 2020).

83 **Schwantes-2019:**



84 The initial concentrations include isoprene,  $\text{CHO}_3\text{NO}$ ,  $\text{NO}$ ,  $\text{NO}_2$ . The input values are  
85 shown in Table S5. The initial  $\text{NO}_x$ /isoprene ratios were 8.7-13.2. The  $J_{\text{NO}_2}$  is set as  $4 \times 10^{-4} \text{ s}^{-1}$  and  
86 the other J values are calculated from solar zenith angle ( $\text{SZA}=84.525$ ), which can best fit the  $J_{\text{NO}_2}$ .  
87 The  $C^*$  threshold is set as  $100 \mu\text{g m}^{-3}$ . The model simulation doesn't include particle wall loss.  
88 The threshold to invoke wall partitioning is  $1 \times 10^6 \mu\text{g m}^{-3}$ ; The equivalent absorbing organic mass  
89 concentration of the wall material is set as  $1 \times 10^4 \mu\text{g m}^{-3}$ ; and the timescale to mix vapors to wall  
90 surface is set as  $2.5 \times 10^{-4} \text{ s}^{-1}$ .

91 **Ng-2008:**

92 Ng-2008 were performed in the dark at room temperature and under dry conditions  
93 ( $\text{RH}<10\%$ ) using  $\text{N}_2\text{O}_5$  as a source of  $\text{NO}_3$  radicals. The initial isoprene concentration was 18.4-  
94 101.6 ppb and seed aerosols are introduced into the chamber for most experiments. The initial  
95 concentrations include isoprene and  $\text{N}_2\text{O}_5$ , as shown in Table S6. For these nighttime oxidation  
96 simulations, the SZA is set as 90. For the vapor wall loss, the threshold to invoke wall partitioning  
97 is  $1 \times 10^6 \mu\text{g m}^{-3}$ ; The equivalent absorbing organic mass concentration of the wall material is set  
98 as  $1 \times 10^4 \mu\text{g m}^{-3}$ ; and the timescale to mix vapors to wall surface is set as  $2.5 \times 10^{-4} \text{ s}^{-1}$ . No particle  
99 wall loss is included in the model simulation.

100 **Schwantes-2015:**

101 Only the Experiment 8 in the reference is simulated here. The initial concentrations include  
102 isoprene (24 ppb),  $\text{NO}_2$  (100 ppb),  $\text{HCHO}$  (4 ppm) and  $\text{O}_3$  (49 ppb). The SZA is set as 90 and all  
103 the J values are 0, corresponding to nighttime oxidation.

104 **Carlsson-2023:**

105           The initial concentrations include: O<sub>3</sub>, NO<sub>2</sub>, isoprene, NO<sub>3</sub>. The input values are shown in  
106 Table S7. The temperature was set as 292 K. The SZA is set as 90, so all the J values are 0  
107 corresponding to nighttime oxidation.

108

109 **Table S1.** Abbreviated names and descriptions of species appearing in the UCR-ISOP mechanism.

| Abbreviated Name | Description                                                                                          |
|------------------|------------------------------------------------------------------------------------------------------|
| ISOP             | Isoprene                                                                                             |
| MACR             | Methacrolein                                                                                         |
| MVK              | Methyl vinyl ketone                                                                                  |
| IEPOXOO          | Peroxy radicals formed from IEPOX                                                                    |
| NISOPO2          | Lumped isoprene nitrooxy peroxy radicals                                                             |
| NIT1NO3OOA       | Peroxy radicals formed from NIT1 oxidation (OH-abstraction of the aldehydic hydrogen atom)           |
| NIT1OHOO         | Peroxy radicals formed from isoprene 1-hydroxy nitrates                                              |
| IMACO3           | Peroxymethacryl radical ( $\text{CH}_2=\text{C}(\text{CH}_3)\text{C}(\text{O})\text{O}_2$ )          |
| MACROO           | Lumped peroxy radicals produced from MACR oxidation (OH addition)                                    |
| MVKOO            | Lumped peroxy radicals produced from MVK oxidation (OH addition)                                     |
| HC5              | C5 hydroxy carbonyls                                                                                 |
| NIT1             | Lumped isoprene carbonyl nitrates                                                                    |
| NISOPOOH         | Lumped isoprene hydroperoxyl nitrates                                                                |
| MACRN            | Lumped MACR nitrate                                                                                  |
| MVKN             | Lumped MVK nitrate                                                                                   |
| IMPAA            | methacrylic peracid                                                                                  |
| IMAPAN           | Methacryloyl peroxy nitrate                                                                          |
| IMAE             | Methacrylic acid epoxide                                                                             |
| IHMML            | Hydroxymethyl-methyl-alpha-lactone                                                                   |
| PYRUACD          | Pyruvic acid                                                                                         |
| HPALD1           | Lumped Z-hydroperoxy-methyl-butenals                                                                 |
| HPALD2           | Isoprene hydroperoxy aldehydes                                                                       |
| ISOPOOH12        | 1,2-isoprene hydroxy hydroperoxides                                                                  |
| ISOPOOH43        | 4,3-isoprene hydroxy hydroperoxides                                                                  |
| ISOPOOHD         | Delta isoprene hydroxy hydroperoxides                                                                |
| IEPOXB           | 1,4-dihydroxy epoxides                                                                               |
| IEPOXD           | 3,4-dihydroxy epoxides                                                                               |
| ISOP1OH2N        | 1,2-isoprene-derived hydroxy nitrate                                                                 |
| ISOP3N4OH        | 4,3-isoprene-derived hydroxy nitrate                                                                 |
| ISOPHND          | Isoprene-derived hydroxy nitrates                                                                    |
| IDH              | Lumped isoprene dihydroxy products                                                                   |
| IDC              | Lumped isoprene dicarbonyls                                                                          |
| IDN              | Lumped isoprene dinitrates                                                                           |
| ICHE             | Lumped isoprene C5 oxidation products with 1 carbonyl, 1 hydroxy and 1 epoxide functional group      |
| IDHPE            | Lumped isoprene C5 oxidation products with 2 hydroxy, 1 hydroperoxide and 1 epoxide functional group |
| IDNE             | Isoprene dinitrate epoxides                                                                          |
| IHPE             | Lumped isoprene hydroxy hydroperoxyl epoxides                                                        |

|        |                                                                                                        |
|--------|--------------------------------------------------------------------------------------------------------|
| IHNE   | Lumped isoprene hydroxy nitrate epoxides                                                               |
| INPE   | Lumped isoprene nitrate hydroperoxyl epoxides                                                          |
| ICNE   | Lumped isoprene carbonyl nitrate epoxides                                                              |
| ICPE   | Lumped isoprene carbonyl hydroperoxyl epoxides                                                         |
| IHNPE  | Lumped isoprene hydroxy nitrate hydroperoxyl epoxides                                                  |
| ICPDH  | Lumped isoprene C5 oxidation products with 1 carbonyl, 1 hydroperoxide and 2 hydroxy functional groups |
| IDHDP  | Lumped isoprene dihydroxy dihydroperoxides                                                             |
| IDCHP  | Lumped isoprene C5 oxidation products with 2 carbonyl, 1 hydroxy and 1 hydroperoxide functional group  |
| ITHP   | Lumped isoprene C5 oxidation products with 3 hydroxyl group and 1 hydroperoxide                        |
| ITHC   | Lumped isoprene C5 oxidation products with 1 carbonyl and 3 hydroxyl functional groups                 |
| ICHNP  | Lumped isoprene C5 oxidation products with 1 carbonyl, 1 hydroxy, and 1 epoxide functional group       |
| IDHDN  | Lumped isoprene C5 oxidation products with 2 hydroxy, 2 nitrate functional groups                      |
| IDHPN  | Lumped isoprene C5 oxidation products with 2 hydroxy, 1 hydroperoxide and 1 nitrate functional group   |
| IDHCN  | Lumped isoprene C5 oxidation products with 2 hydroxy, 1 carbonyl and 1 nitrate functional group        |
| ICHDN  | Lumped isoprene C5 oxidation products with 1 carbonyl, 1 hydroxyl and 2 nitrate functional groups      |
| ICDPN  | Lumped isoprene C5 oxidation products with 1 carbonyl, 2 hydroperoxide and 1 nitrate functional group  |
| IHPDN  | Lumped isoprene C5 oxidation products with 1 hydroxy, 1 hydroperoxide and 2 nitrate functional groups  |
| IHNDP  | Lumped isoprene C5 oxidation products with 1 hydroxy, 1 nitrate and 2 hydroperoxide functional groups  |
| IHNDC  | Lumped isoprene C5 oxidation products with 1 hydroxy, 1 nitrate and 2 carbonyl functional groups       |
| ITHN   | Lumped isoprene C5 oxidation products with 3 hydroxy and 1 nitrate functional group                    |
| INPA   | Lumped isoprene C5 oxidation products with 1 nitrate, 1 hydroperoxide and 1 carboxyl group             |
| INCA   | Lumped isoprene C5 oxidation products with 1 nitrate, 1 carbonyl and 1 carboxyl group                  |
| C4HP   | Lumped hydroxy hydroperoxides produced from MACR and MVK oxidation                                     |
| C4HC   | Lumped hydroxy carbonyls produced from MACR and MVK oxidation                                          |
| C4DH   | Lumped dihydroxy oxidation products from MACR and MVK                                                  |
| C4ENOL | Lumped C4 enols from MACR and MVK                                                                      |

|           |                                                                               |
|-----------|-------------------------------------------------------------------------------|
| C4PN      | Lumped hydroperoxyl nitrates produced from MACR and MVK oxidation             |
| HPETHNL   | (Hydroperoxy) ethanal                                                         |
| HPAC      | Peroxyacetone                                                                 |
| MGA       | 2-Methylglyceric acid produced from MACR oxidation (OH addition)              |
| NMGA      | 2-Methylglyceric acid nitrate form produced from MACR oxidation (OH addition) |
| C10dimer  | The dimer products formed from RO2 with RO2                                   |
| ISOP1OHOO | Lumped isoprene 1-hydroxy peroxy radicals                                     |
| ISOP4OHOO | Lumped isoprene 4-hydroxy peroxy radicals                                     |
| ISOPOOHOO | Peroxy radicals formed from ISOPOOH oxidation (OH addition)                   |
| NIEPOXOO  | Nitrated epoxy peroxy radicals                                                |
| ISOPNOO   | Peroxy radicals produced from INTR oxidation                                  |
| IHDNOO    | As above, but from IHDN                                                       |
| IHPNOO    | As above, but from IHPN                                                       |

110

111

112 **Table S2.** The  $C^*$  values under the temperature of 298K for the semi-volatile and low-volatile  
 113 species in ISOP-UCR mechanism. One name in the ISOP-UCR mechanism may correspond to  
 114 several isomers whose SMILES (simplified molecular-input line-entry system) and  $C^*$  values are  
 115 listed in the table too. In the calculation of gas-particle partitioning, the lowest  $C^*$  value in the  
 116 isomers is used.  
 117

| Names | Formula                                       | SMILES                       | $C^*$ _Evaporati<br>on ( $\mu\text{g cm}^{-3}$ ) | $C^*$ _SIMPOL<br>.1 ( $\mu\text{g cm}^{-3}$ ) |
|-------|-----------------------------------------------|------------------------------|--------------------------------------------------|-----------------------------------------------|
| IDHPE | C <sub>5</sub> H <sub>10</sub> O <sub>5</sub> | CC(CO)(OO)C1OC1O             | 15.87                                            | 103.00                                        |
|       |                                               | CC1(C(CO)OO)[O]C1O           | 15.87                                            |                                               |
| IDHDP | C <sub>5</sub> H <sub>12</sub> O <sub>6</sub> | CC(CO)(OO)C(CO)OO            | 0.03                                             | 2.03                                          |
|       |                                               | CC(CO)(OO)C(O)COO            | 0.14                                             |                                               |
|       |                                               | CC(O)(COO)C(CO)OO            | 0.67                                             |                                               |
| ICPDH | C <sub>5</sub> H <sub>10</sub> O <sub>5</sub> | OCC(C(C=O)(O)C)OO            | 244.11                                           | 24.00                                         |
|       |                                               | OOC(C=O)C(C)(O)CO            | 244.11                                           |                                               |
|       |                                               | OCC(O)C(C)(OO)C=O            | 54.02                                            |                                               |
|       |                                               | O=CC(O)C(C)(CO)OO            | 54.02                                            |                                               |
|       |                                               | OCC(=O)C(C)(CO)OO            | 23.72                                            |                                               |
| IDHCN | C <sub>5</sub> H <sub>9</sub> NO <sub>6</sub> | OCC(ON(=O)=O)C(C)(O)C=O      | 2599.78                                          | 51.43                                         |
|       |                                               | O=CC(C)(O)C(O)CON(=O)=O      | 9131.41                                          |                                               |
|       |                                               | O=CC(O)C(C)(CO)ON(=O)=O      | 625.60                                           |                                               |
|       |                                               | O=CC(O)C(C)(O)CON(=O)=O      | 9131.41                                          |                                               |
|       |                                               | OCC(O)C(C)(C=O)ON(=O)=O      | 625.60                                           |                                               |
|       |                                               | [O-][N+](=O)OC(C(CO)(O)C)C=O | 2599.78                                          |                                               |
| IDCHP | C <sub>5</sub> H <sub>8</sub> O <sub>5</sub>  | CC(O)(C(=O)OO)C(=O)C         | 102097.15                                        | 8950.00                                       |
|       |                                               | OCC(C(=O)C)C(=O)OO           | 2454.80                                          | 418.00                                        |
|       |                                               | OCC(OO)(C=O)C(=O)C           | 1045.76                                          |                                               |
|       |                                               | OCC(=O)C(C)(OO)C=O           | 3446.76                                          |                                               |
| ITHP  | C <sub>5</sub> H <sub>12</sub> O <sub>5</sub> | CC(O)(CO)C(CO)OO             | 2.34                                             | 3.33                                          |
|       |                                               | CC(CO)(OO)C(O)CO             | 0.49                                             |                                               |
| ITHC  | C <sub>5</sub> H <sub>10</sub> O <sub>4</sub> | CC(O)(CO)C(=O)CO             | 1461.84                                          | 93.60                                         |
|       |                                               | O=CC(CO)C(O)CO               | 24.46                                            | 38.70                                         |
| IDHPN | C <sub>5</sub> H <sub>11</sub> NO<br>7        | OCC(C)(OO)C(O)CON(=O)=O      | 1.77                                             | 4.29                                          |
|       |                                               | OCC(OO)C(C)(CO)ON(=O)=O      | 0.46                                             |                                               |
|       |                                               | OCC(O)C(C)(CO)ON(=O)=O       | 1.77                                             |                                               |
|       |                                               | OCC(OO)C(C)(O)CON(=O)=O      | 8.00                                             |                                               |
|       |                                               | OCC(ON(=O)=O)C(C)(CO)OO      | 0.46                                             |                                               |
| ICHNP | C <sub>5</sub> H <sub>9</sub> NO <sub>7</sub> | OCC(ON(=O)=O)C(C)(OO)C=O     | 47.21                                            | 30.98                                         |
|       |                                               | OOC(C)(C=O)C(O)CON(=O)=O     | 165.74                                           |                                               |
|       |                                               | OOC(C=O)C(C)(CO)ON(=O)=O     | 47.21                                            |                                               |
|       |                                               | O=CC(O)C(C)(OO)CON(=O)=O     | 165.74                                           |                                               |

|       |                                                                 |                                |             |           |
|-------|-----------------------------------------------------------------|--------------------------------|-------------|-----------|
|       |                                                                 | OCC(C(O[N+](=O)[O-])(C=O)C)OO  | 47.21       |           |
|       |                                                                 | O=CC(C(OO)(CO)C)O[N+](=O)[O-]  | 47.21       |           |
| IDHDN | C <sub>5</sub> H <sub>10</sub> N <sub>2</sub><br>O <sub>8</sub> | OCC(ON(=O)=O)C(C)(CO)ON(=O)=O  | 5.62        | 8.83      |
|       |                                                                 | OCC(C)(ON(=O)=O)C(O)CON(=O)=O  | 19.74       |           |
|       |                                                                 | OCC(ON(=O)=O)C(C)(O)CON(=O)=O  | 82.02       |           |
| ICHDN | C <sub>5</sub> H <sub>8</sub> N <sub>2</sub> O<br>8             | O=CC(ON(=O)=O)C(C)(CO)ON(=O)=O | 492.21      | 64.04     |
|       |                                                                 | OCC(ON(=O)=O)C(C)(C=O)ON(=O)=O | 492.21      |           |
|       |                                                                 | O=CC(C)(ON(=O)=O)C(O)CON(=O)=O | 1391.55     |           |
|       |                                                                 | O=CC(ON(=O)=O)C(C)(O)CON(=O)=O | 4786.72     |           |
| IHPDN | C <sub>5</sub> H <sub>10</sub> N <sub>2</sub><br>O <sub>9</sub> | CC(CO)(ON(=O)=O)C(COO)ON(=O)=O | 1.46        | 5.24      |
|       |                                                                 | CC(COO)(ON(=O)=O)C(CO)ON(=O)=O | 1.46        |           |
|       |                                                                 | CC(COO)(ON(=O)=O)C(O)CON(=O)=O | 5.14        |           |
|       |                                                                 | CC(O)(CON(=O)=O)C(COO)ON(=O)=O | 21.36       |           |
| IHNDP | C <sub>5</sub> H <sub>11</sub> NO<br>8                          | CC(CO)(OO)C(COO)ON(=O)=O       | 0.13        | 2.57      |
|       |                                                                 | CC(CO)(OO)C(CON(=O)=O)OO       | 0.13        |           |
|       |                                                                 | CC(COO)(ON(=O)=O)C(CO)OO       | 0.13        |           |
|       |                                                                 | CC(CON(=O)=O)(OO)C(CO)OO       | 0.13        |           |
|       |                                                                 | CC(CO)(ON(=O)=O)C(COO)OO       | 0.13        |           |
|       |                                                                 | CC(COO)(OO)C(CO)ON(=O)=O       | 0.13        |           |
| IHNDP | C <sub>5</sub> H <sub>7</sub> NO <sub>6</sub>                   | O=CC(=O)C(C)(CO)ON(=O)=O       | 34628.29    | 896.43    |
|       |                                                                 | O=CC(O)C(C)(C=O)ON(=O)=O       | 50778.52    |           |
|       |                                                                 | O=CC(=O)C(C)(O)CON(=O)=O       | 336740.22   |           |
|       |                                                                 | O=CC(C(C=O)(O)C)O[N+](=O)[O-]  | 174659.59   |           |
| ITHN  | C <sub>5</sub> H <sub>11</sub> NO<br>6                          | CC(O)(CO)C(CO)ON(=O)=O         | 29.08       | 7.11      |
|       |                                                                 | CC(CO)(ON(=O)=O)C(O)CO         | 6.44        |           |
| IHNPE | C <sub>5</sub> H <sub>9</sub> NO <sub>7</sub>                   | O=N(=O)OCC1(COO)OC1CO          | 28.47       | 132.21    |
| ICNE  | C <sub>5</sub> H <sub>7</sub> NO <sub>5</sub>                   | CC1(CON(=O)=O)OC1C=O           | 1282937.17  | 220289.06 |
| INPE  | C <sub>5</sub> H <sub>9</sub> NO <sub>6</sub>                   | CC1(COO)OC1CON(=O)=O           | 12333.61    | 18569.88  |
| IHNE  | C <sub>5</sub> H <sub>9</sub> NO <sub>5</sub>                   | CC1(CO)OC1CON(=O)=O            | 50430.41    | 30557.83  |
| ICPE  | C <sub>5</sub> H <sub>8</sub> O <sub>4</sub>                    | CC1(COO)OC1C=O                 | 364022.82   | 101000.00 |
| ICHE  | C <sub>5</sub> H <sub>8</sub> O <sub>3</sub>                    | CC1(CO)OC1C=O                  | 14117988.17 | 160000.00 |

|      |                   |                                         |          |          |
|------|-------------------|-----------------------------------------|----------|----------|
| IDNE | $C_5H_8N_2O$<br>7 | <chem>CC1(CON(=O)=O)OC1CON(=O)=O</chem> | 42133.98 | 38763.39 |
| IHPE | $C_5H_{10}O_4$    | <chem>CC1(COO)OC1CO</chem>              | 16317.00 | 13969.74 |
| INPA | $C_5H_7NO_6$      | <chem>CC(=CC(=O)OO)CON(=O)=O</chem>     | 40944.98 | 71687.98 |
| INCA | $C_5H_7NO_5$      | <chem>CC(=CC(=O)O)CON(=O)=O</chem>      | 4509.29  | 5389.39  |



**Table S3.** The initial conditions of UNC chamber experiments.

| Run       | [isoprene]<br>(ppb) | [NO]<br>(ppb) | [NO <sub>2</sub> ]<br>(ppb) | [NO <sub>x</sub> ]<br>(ppb) | [isoprene]/[NO <sub>x</sub> ] |
|-----------|---------------------|---------------|-----------------------------|-----------------------------|-------------------------------|
| 20090701N | 400                 | 159.9         | 29.6                        | 189.5                       | 2.11                          |
| 20090703N | 400                 | 183.1         | 26                          | 209.1                       | 1.91                          |
| 20090703S | 400                 | 95.6          | 22.6                        | 118.2                       | 3.38                          |
| 20100622N | 1100                | 91.2          | 26.3                        | 117.5                       | 9.36                          |
| 20100622S | 1250                | 185.8         | 50.1                        | 235.9                       | 5.30                          |
| 20100705N | 410                 | 93.8          | 5.3                         | 99.1                        | 4.14                          |
| 20100904N | 950                 | 29.1          | 24.6                        | 53.7                        | 17.69                         |
| 20100904S | 800                 | 104.4         | 30.3                        | 134.7                       | 5.94                          |
| 20101015N | 400                 | 142           | 9                           | 151                         | 2.65                          |
| 20101015S | 430                 | 138.3         | 0.1                         | 138.4                       | 3.11                          |
| 20101021N | 790                 | 253.4         | 0.1                         | 253.5                       | 3.12                          |
| 20101021S | 800                 | 252           | 0                           | 252                         | 3.17                          |
| 20110630S | 392                 | 94.4          | 32.2                        | 126.6                       | 3.10                          |
| 20120531S | 950                 | 209.5         | 36.3                        | 245.8                       | 3.86                          |
| 20120603N | 780                 | 65.2          | 38.7                        | 103.9                       | 7.51                          |
| 20120603S | 590                 | 66.6          | 38.7                        | 105.3                       | 5.60                          |
| 20120608N | 1000                | 73.7          | 29                          | 102.7                       | 9.74                          |
| 20120608S | 370                 | 74.7          | 29.5                        | 104.2                       | 3.55                          |
| 20120628S | 200                 | 68.8          | 31.5                        | 100.3                       | 1.99                          |
| 20120630N | 760                 | 141.7         | 49                          | 190.7                       | 3.99                          |
| 20120630S | 680                 | 141.4         | 49.6                        | 191                         | 3.56                          |
| 20120705N | 980                 | 163           | 23.8                        | 186.8                       | 5.25                          |
| 20120705S | 410                 | 162.6         | 25.9                        | 188.5                       | 2.18                          |

**Table S4.** The initial conditions of Kroll-2006 and PNNL-2018 experiments.

| Chamber    | Run | [isoprene]<br>(ppb) | [H <sub>2</sub> O <sub>2</sub> ]<br>(ppm) | [NO]<br>(ppb) | [Seed]<br>( $\mu\text{m}^3 \text{cm}^{-3}$ ) | T (°C) |
|------------|-----|---------------------|-------------------------------------------|---------------|----------------------------------------------|--------|
| Kroll-2006 | 1   | 90                  | 3.5                                       | 0             | N/A                                          | 25.4   |
|            | 2   | 46.1                | 3.5                                       | 0             | N/A                                          | 25.6   |
|            | 3   | 23                  | 3.5                                       | 0             | N/A                                          | 26     |
|            | 4   | 12.2                | 3.5                                       | 0             | N/A                                          | 25.7   |
|            | 5   | 63.6                | 3.5                                       | 0             | N/A                                          | 26.7   |
|            | 6   | 29.4                | 3.5                                       | 0             | N/A                                          | 28.7   |
|            | 7   | 47.8                | 3.5                                       | 0             | N/A                                          | 26.6   |
|            | 8   | 41.6                | 3.5                                       | 0             | N/A                                          | 26.4   |
|            | 9   | 46.7                | 3.5                                       | 242           | 4.6                                          | 28.3   |
|            | 10  | 43.5                | 3.5                                       | 496           | 7.1                                          | 28.3   |
|            | 11  | 42.7                | 3.5                                       | 98            | 6.4                                          | 28.1   |
|            | 12  | 49.1                | 3.5                                       | 51            | 6.5                                          | 28.2   |
|            | 13  | 42.7                | 3.5                                       | 337           | 4.8                                          | 28.3   |
|            | 14  | 42                  | 3.5                                       | 708           | 4.7                                          | 27.5   |
| PNNL-2018  | 1   | 43.5                | 7.5                                       | 0             | 0.3                                          | 24     |
|            | 2   | 65                  | 7.5                                       | 0             | 0.3                                          | 24     |
|            | 3   | 69                  | 7.5                                       | 0             | 0.3                                          | 24     |
|            | 4   | 56.5                | 7.5                                       | 0             | 0.3                                          | 24     |
|            | 5   | 51                  | 7.5                                       | 0             | 0.3                                          | 24     |
|            | 6   | 57                  | 7.5                                       | 0             | 0.3                                          | 24     |
|            | 7   | 48                  | 7.5                                       | 0             | 0.3                                          | 24     |
| PNNL-2014  | 1   | 26                  | 15                                        | 0             | 0.3                                          | 25.4   |
|            | 2   | 26                  | 10                                        | 0             | 0.3                                          | 25.4   |
|            | 3   | 26                  | 10                                        | 2             | 0.3                                          | 25.4   |
|            | 4   | 26                  | 10                                        | 5             | 0.3                                          | 25.4   |
|            | 5   | 26                  | 10                                        | 10            | 0.3                                          | 25.4   |
|            | 6   | 26                  | 10                                        | 20            | 0.3                                          | 25.4   |
|            | 7   | 26                  | 10                                        | 50            | 0.3                                          | 25.4   |

123

**Table S5.** The experimental conditions of Schwantes-2019 experiments.

| Run | [isoprene]<br>(ppb) | [NO]<br>(ppb) | [NO <sub>2</sub> ]<br>(ppb) | [CH <sub>3</sub> ONO]<br>(ppb) | [Seed]<br>( $\mu\text{m}^3\text{cm}^{-3}$ ) | T (°C) | RH (%) |
|-----|---------------------|---------------|-----------------------------|--------------------------------|---------------------------------------------|--------|--------|
| 1   | 59                  | 585           | 6                           | 118                            | 0                                           | 25.6   | 5      |
| 2   | 58                  | 526           | 20                          | 117                            | 54                                          | 26.4   | 5.6    |
| 3   | 57                  | 519           | 17                          | 117                            | 183                                         | 25.9   | 7.5    |
| 4   | 58                  | 518           | 18                          | 116                            | 337                                         | 26.4   | 7.9    |
| 5   | 55                  | 506           | 20                          | 117                            | 159                                         | 12.8   | 16.4   |
| 6   | 56                  | 541           | 16                          | 118                            | 152                                         | 32.4   | 5.9    |
| 7   | 40                  | 527           | 18                          | 117                            | 197                                         | 25.9   | 8.1    |
| 8   | 60                  | 519           | 20                          | 118                            | 109                                         | 25.5   | 44.7   |
| 9   | 55                  | 489           | 20                          | 119                            | 166                                         | 25.6   | 78.1   |
| 10  | 58                  | 516           | 17                          | 111                            | 85                                          | 25.8   | 5.1    |
| 11  | 56                  | 490           | 17                          | 115                            | 264                                         | 25.8   | 5.2    |

124

125

**Table S6.** The experimental conditions of Ng-2008 experiments.

| Run | [isoprene]<br>(ppb) | [N <sub>2</sub> O <sub>5</sub> ] (ppb) | T (°C) | RH (%) | SOA Yield<br>(%) |
|-----|---------------------|----------------------------------------|--------|--------|------------------|
| 1   | 101.6               | 1000                                   | 21     | 5.1    | 23.8             |
| 2   | 30.2                | 1000                                   | 20     | 4.7    | 13.5             |
| 3   | 67.1                | 1000                                   | 21     | 5.4    | 20.8             |
| 4   | 51.7                | 1000                                   | 20     | 6      | 18.2             |
| 5   | 18.4                | 1000                                   | 21     | 5.7    | 4.3              |
| 6   | 21.8                | 1000                                   | 21     | 5.5    | 7.8              |
| 7   | 39.5                | 1000                                   | 20     | 5.5    | 7.1              |
| 8   | 42                  | 1000                                   | 21     | 6.4    | 14.1             |

126

127

**Table S7.** The experimental conditions of Carlsson-2023.

| Run | [isoprene] (ppb) | [NO <sub>3</sub> ] (ppt) | [NO <sub>2</sub> ] (ppb) | [O <sub>3</sub> ] (ppb) | T (K) |
|-----|------------------|--------------------------|--------------------------|-------------------------|-------|
| 1   | 2.4              | 5                        | 5                        | 101                     | 297   |
| 2   | 1.69             | 40                       | 4.5                      | 100                     | 295   |
| 3   | 2.5              | 3.5                      | 12                       | 78                      | 295   |
| 4   | 4.4              | 250                      | 25                       | 105                     | 292   |

128

129

**Table S8.** The parameters in the calculation of reactive uptake of IEPOX.

| Product species | Parent species | Nucleophile | $k_{i,H^+} [M^{-2}S^{-1}]$ | $k_{i,HSO_4^-} [M^{-2}S^{-1}]$ |
|-----------------|----------------|-------------|----------------------------|--------------------------------|
| 2-MT            | IEPOX          | Water       | $2 \times 10^{-4}$         | $1.3 \times 10^{-5}$           |
| IEPOX- OS       | IEPOX          | Sulfate     | $2 \times 10^{-4}$         | $2.9 \times 10^{-6}$           |

130

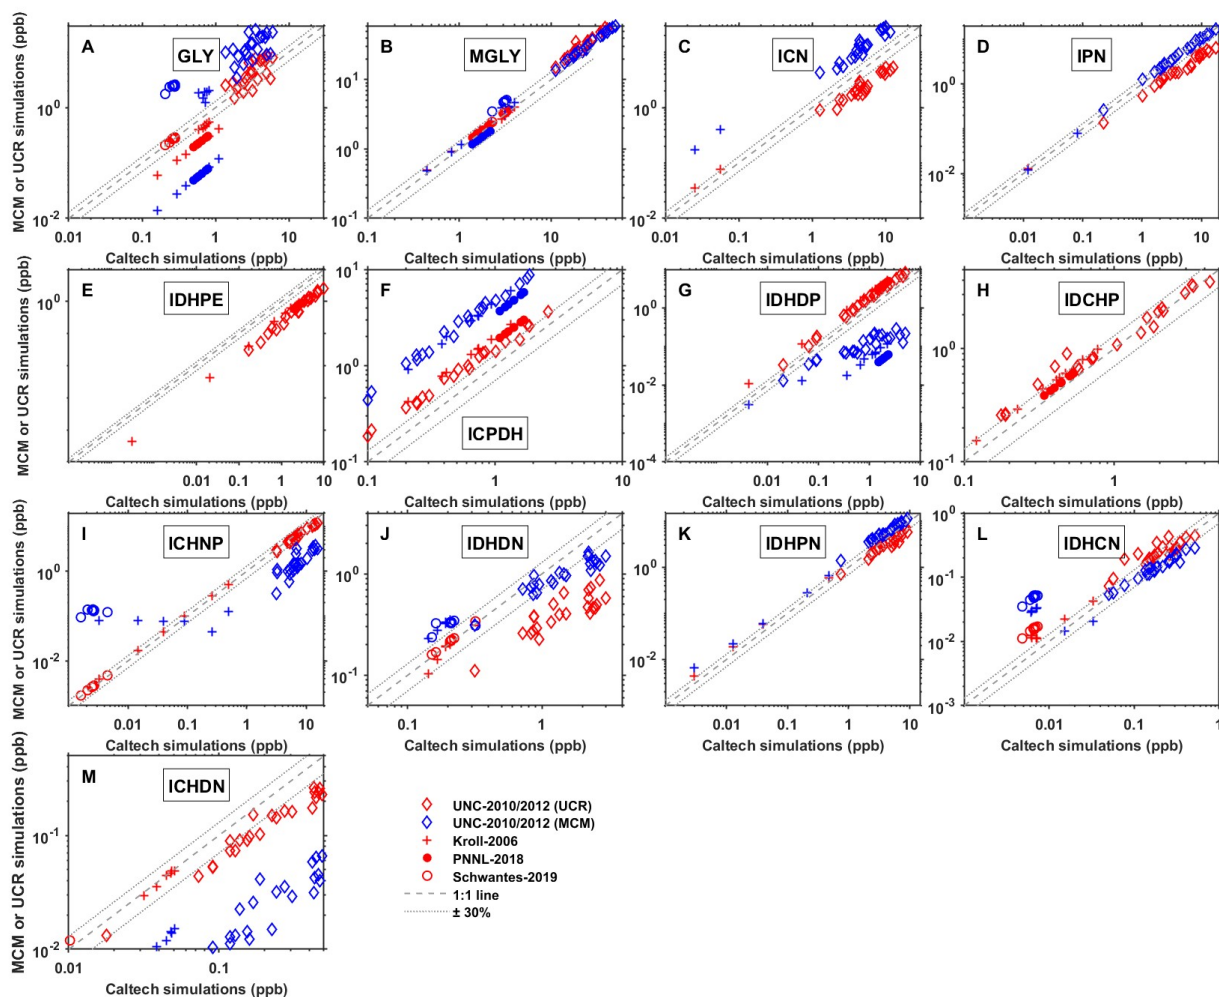

131

132 **Figure S1.** Comparison of simulated and measured species' maximum concentrations from

133 different chemical mechanisms. The *x*-axis represents maximum concentrations from Caltech

134 mechanism and *y*-axis represents values from UCR-ISOP (red markers) or MCM mechanism (blue

135 markers). Different marker types represent different chamber studies.

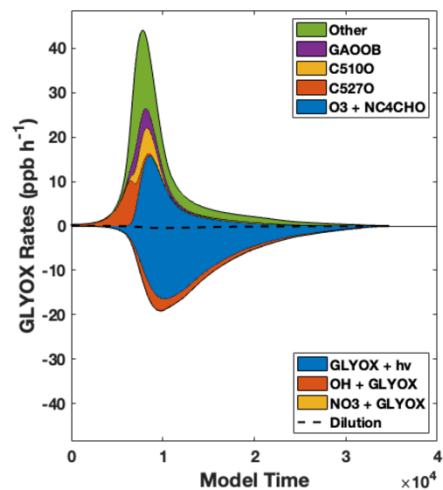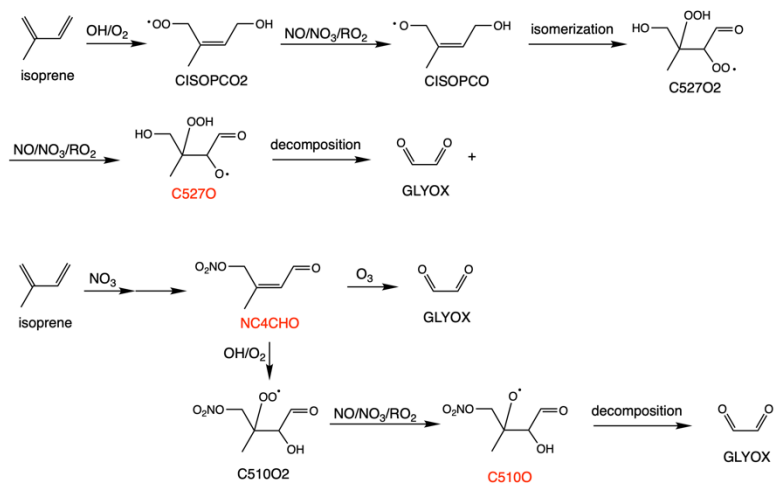

136

137 **Figure S2.** Left panel: major contributors to the formation and consumption of glyoxal (GLYOX)

138 in the MCM mechanism. Right panel: MCM pathways leading to glyoxal formation.



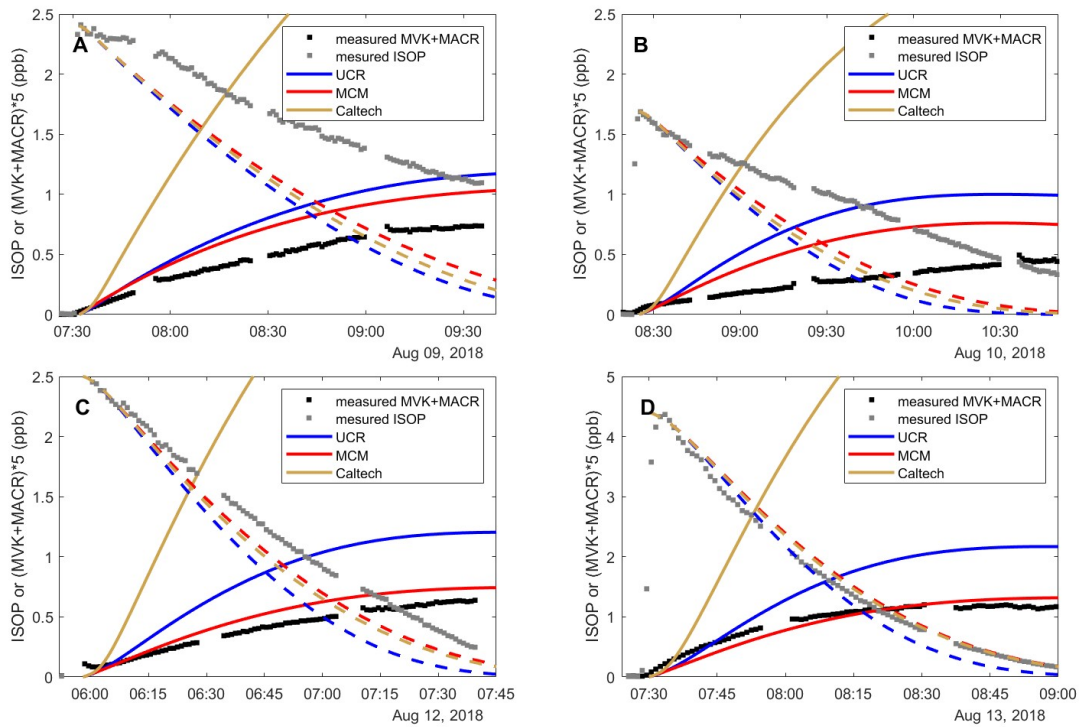

139

140 **Figure S3.** The simulation of Carlsson-2023 chamber study using different chemical mechanisms.

141 The Caltech mechanism largely overpredict the concentration of MVK+MACR compared to

142 measurements. The isoprene decays were overpredicted in (a)-(c) possibly due to the uncertainties

143 in initial isoprene and  $\text{NO}_3$  concentrations.

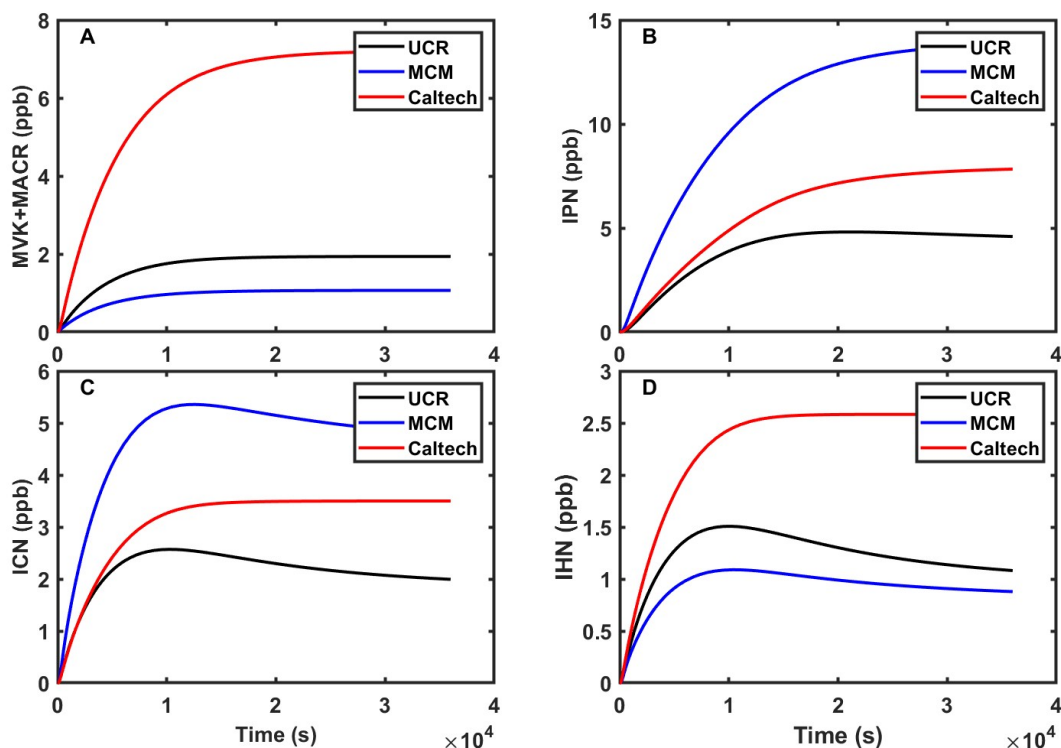

144  
 145 **Figure S4.** The simulation of Experiment 8 in Schwantes-2015 chamber study using different  
 146 chemical mechanisms. (a) is the comparison of MVK+MACR; (b) is the comparison of  
 147 hydroperoxide nitrates (IPN); (c) is the carbonyl nitrates (ICN) and (d) is the hydroxyl nitrates  
 148 (IHN). In comparison to the measurements (see Schwantes et al. (2015) Fig. 2), the simulated IPN  
 149 is slightly higher (5 ppb vs. 4 ppb); the simulated ICN is higher by a factor of ~2 (2 ppb vs. 1.2  
 150 ppb); and IHN is similar (~ 1 ppb). The later decreases in the UCR-ISOP and MCM mechanisms  
 151 are due to further oxidation, which is not included in the Caltech mechanism.

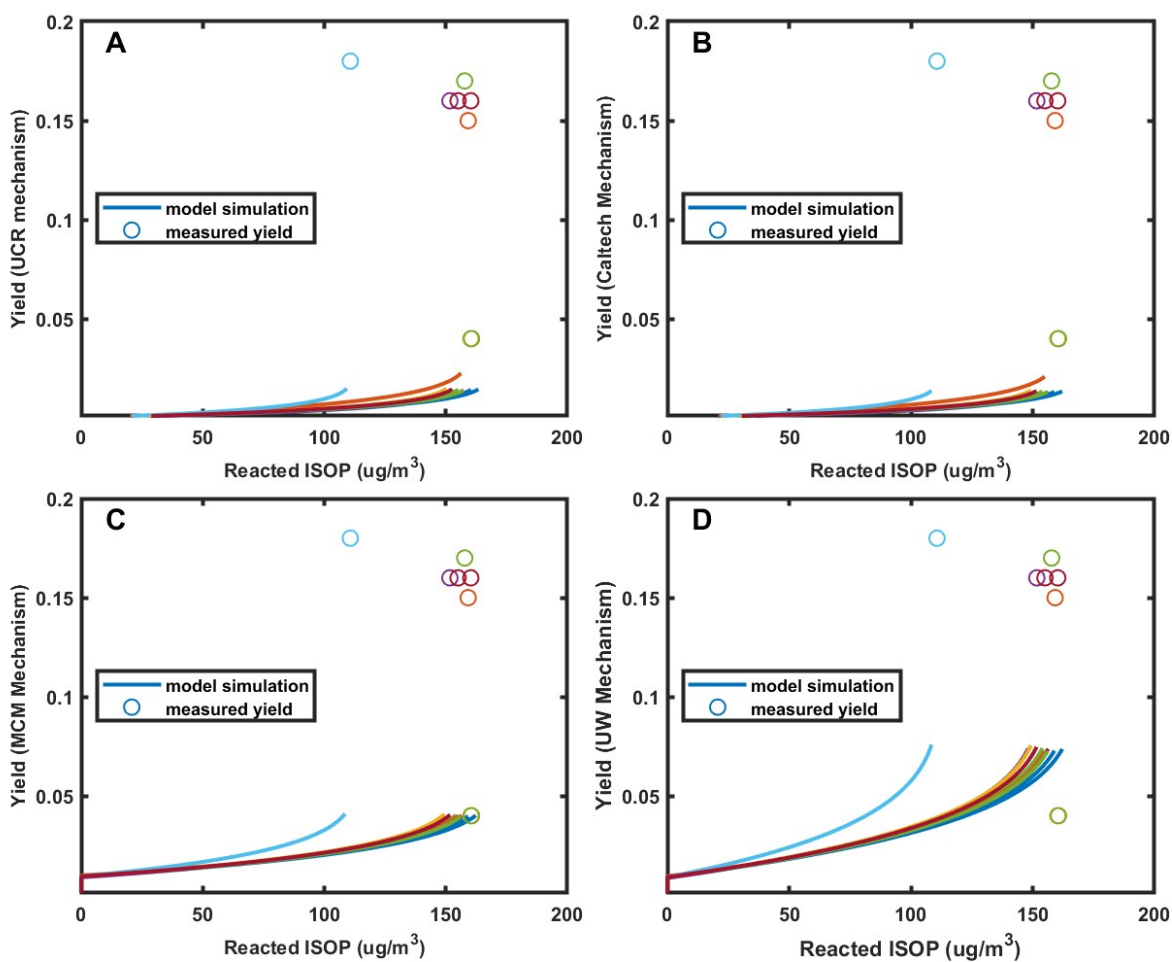

152  
 153 **Figure S5.** Model predicted isoprene SOA yield using different chemical mechanisms for  
 154 Schwantes-2019 chamber study under high-NO<sub>x</sub> conditions. Different colors represent different  
 155 experimental runs. Experimental conditions for each run can be found in Table S5. The yield is  
 156 calculated from the modeled gas phase concentrations of IDHDN, IDHPN, IDHPN, ICHNP,  
 157 IDHCN and ICHDN assuming they can entirely partition into particle phase.

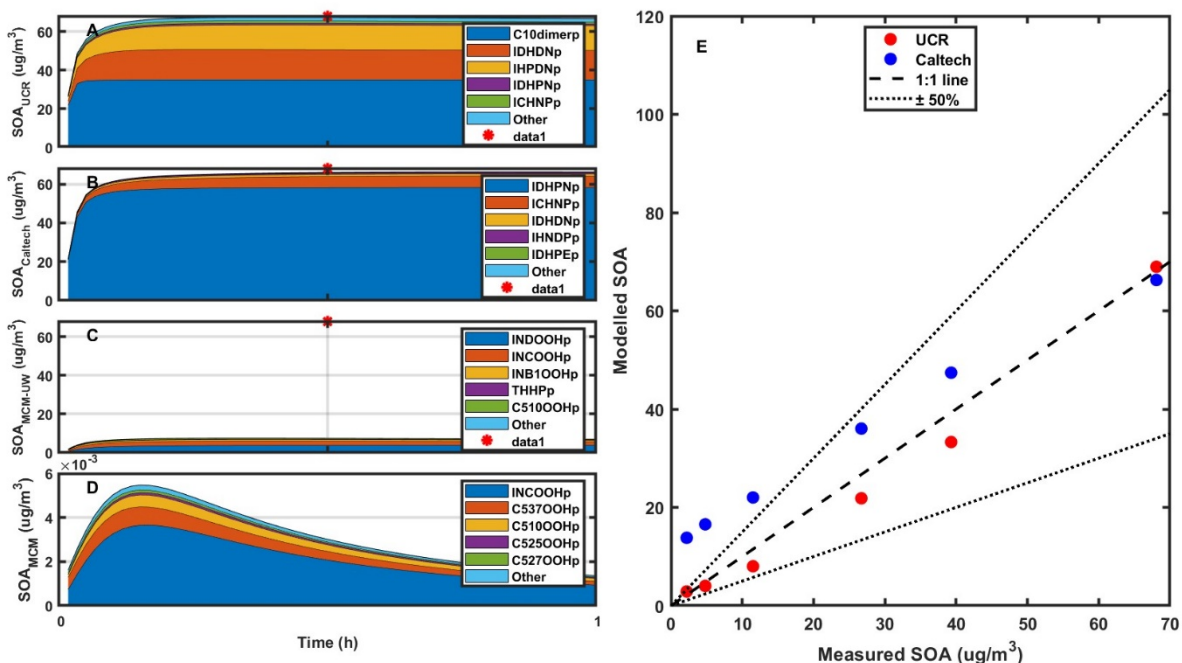

158

159 **Figure S6.** (a-d) The chemical constituents of modeled isoprene SOA in the Ng-2008 chamber  
 160 study using different chemical mechanisms: (a) UCR-ISOP; (b) Caltech; (c) MCM-UW; and (d)  
 161 MCM. In the MCM-UW mechanism, INDOOH, INCOOH and INB1OOH correspond to three  
 162 isomers of IDHPN in UCR-ISOP mechanism; THHP correspond to the species with three -OH  
 163 functional groups and one -OOH functional group. The species corresponding to the names in (c-  
 164 d) can be found in MCM website (<https://mcm.york.ac.uk/MCM>). (e) The comparison of modeled  
 165 SOA and measured SOA using UCR-ISOP and the Caltech mechanism.

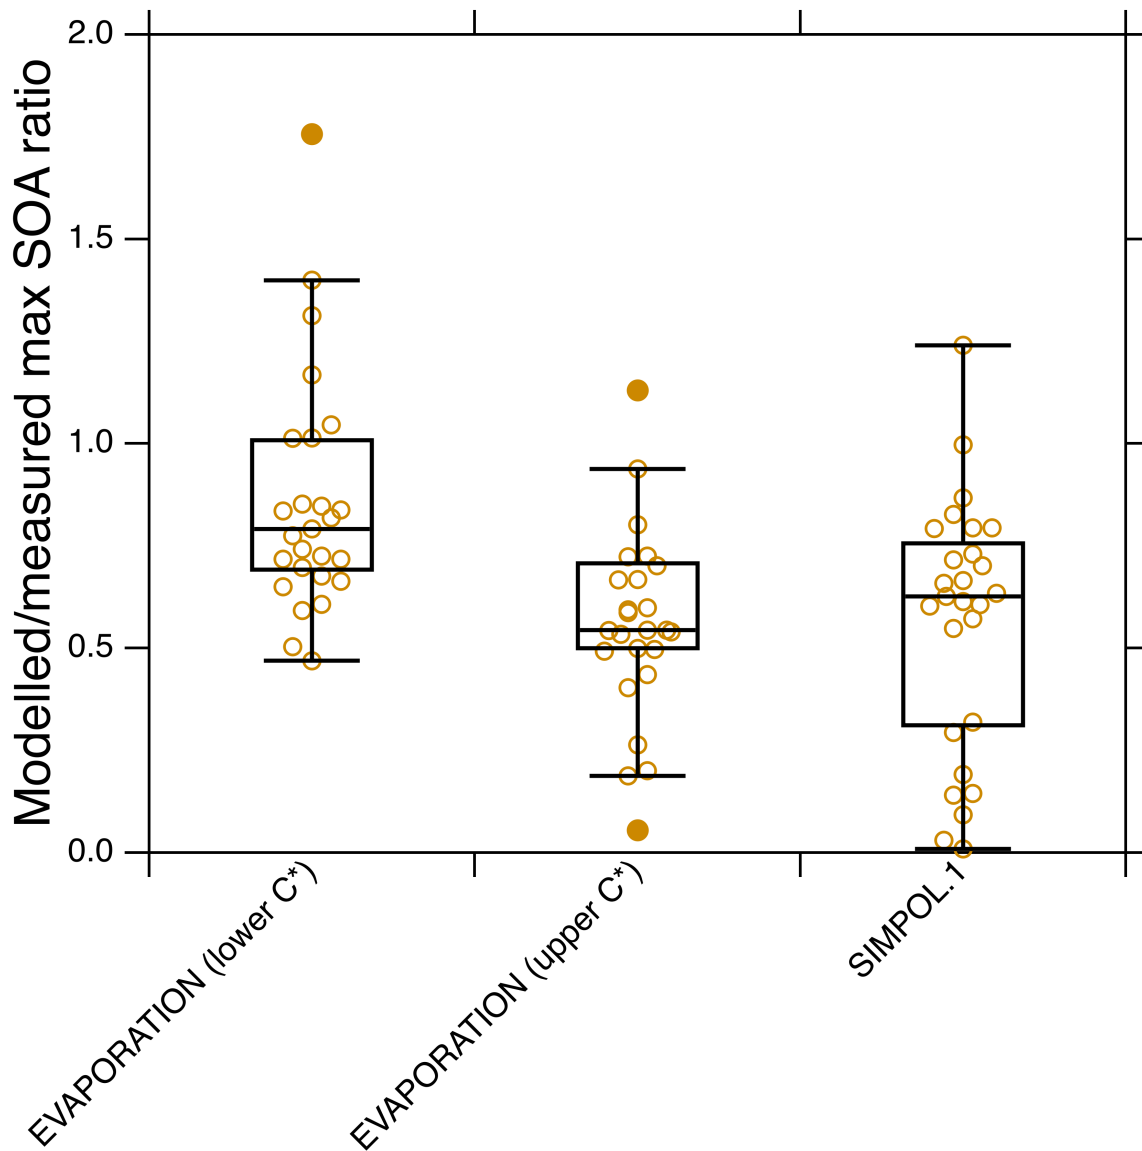

166

167 **Figure S7.** The distribution of modelled/measured SOA ratio using different vapor pressure  
 168 estimation methods. The data used includes Kroll-2006, PNNL-2018, PNNL-2014 and Ng-2008  
 169 chamber experiments. For each box, the central horizontal line in the box indicates the median,  
 170 and the bottom and top edges of the box indicate the 25<sup>th</sup> and 75<sup>th</sup> percentiles, respectively. The  
 171 whiskers extend to the most extreme data points not considered outliers, and the outliers are plotted  
 172 using the solid circle markers (other data points plotted using open circle markers).

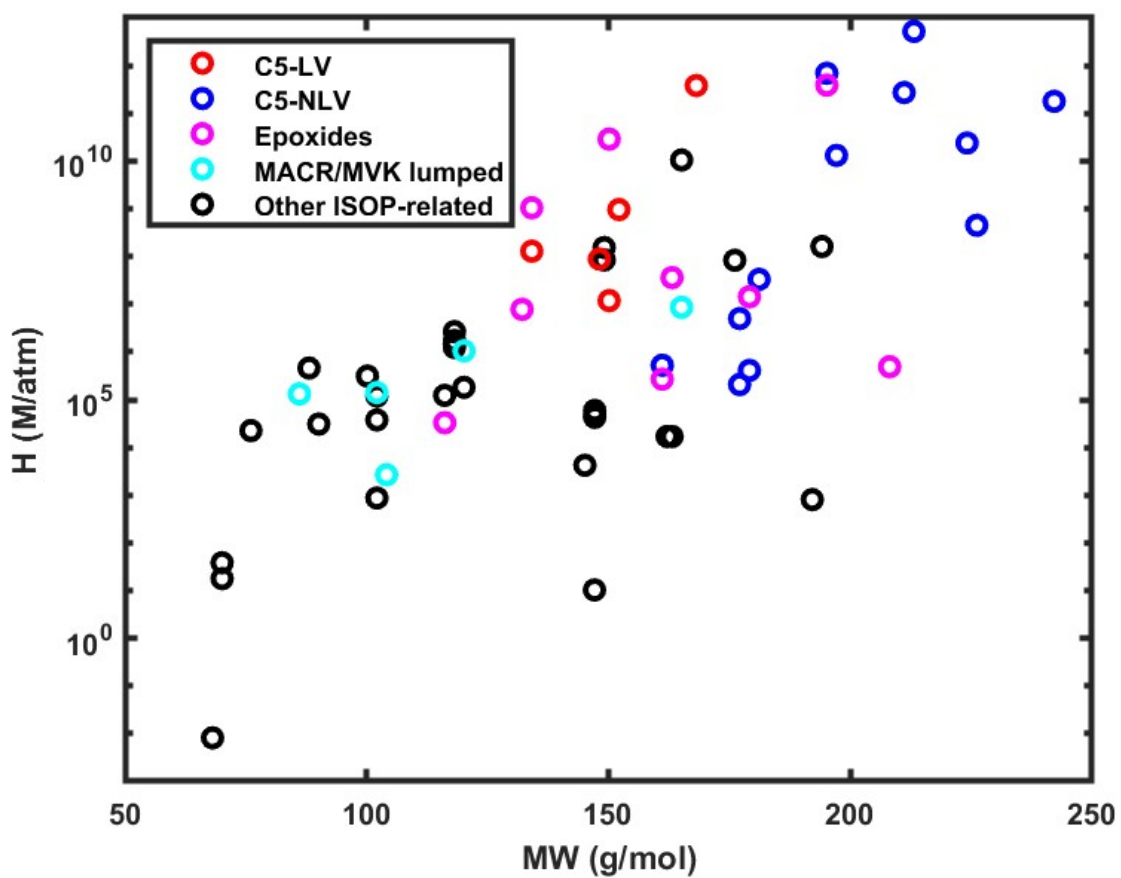

173

174 **Figure S8.** The distribution of Henry's law constants ( $H_{aq}$ ) and molecular weight (MW) for  
 175 isoprene oxidation products. Different colors represent different groups, e.g., the red open circles  
 176 represent those five-carbon low-volatile species without nitrogen (C5-LV) and the blue open  
 177 circles represent those five-carbon nitrogen-containing low-volatile species (C5-NLV).

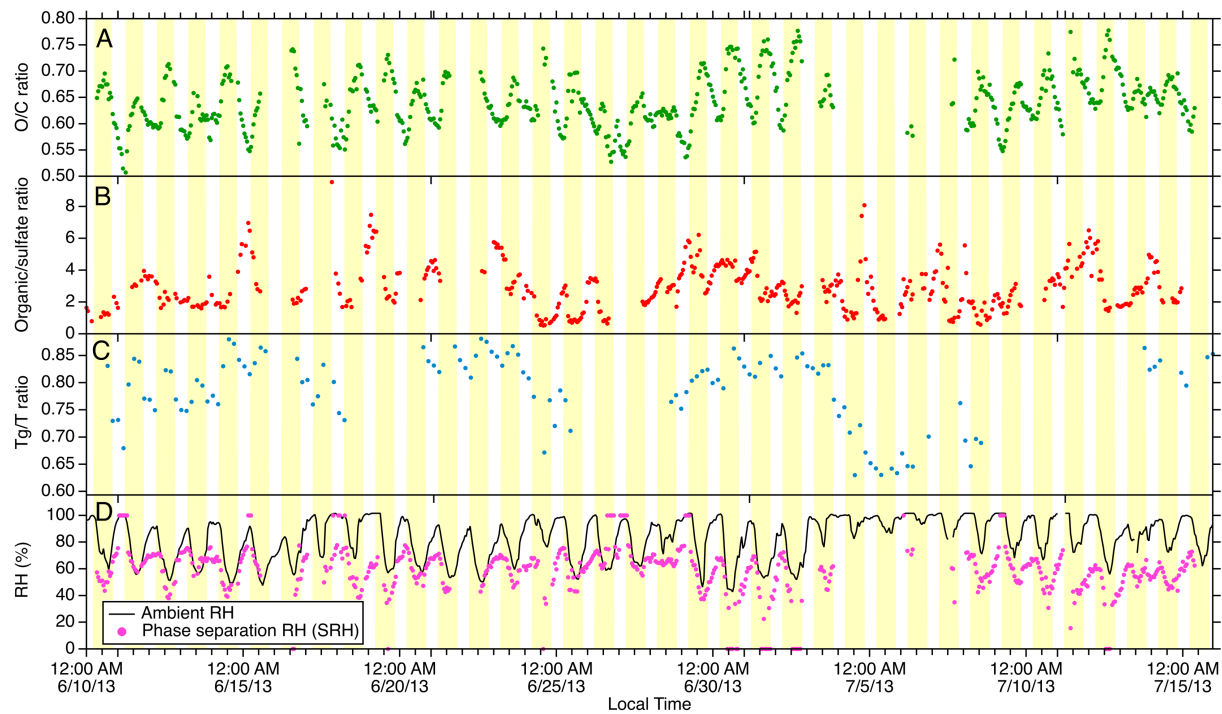

178

179 **Figure S9.** The time series of (A) measured O/C ratio, (B) organic aerosol/sulfate ratio, (C) glass  
 180 transition temperature ( $T_g$ ) over ambient temperature (T) (Schmedding et al., 2020), and (D)  
 181 predicted phase separation RH (SRH) and ambient RH.

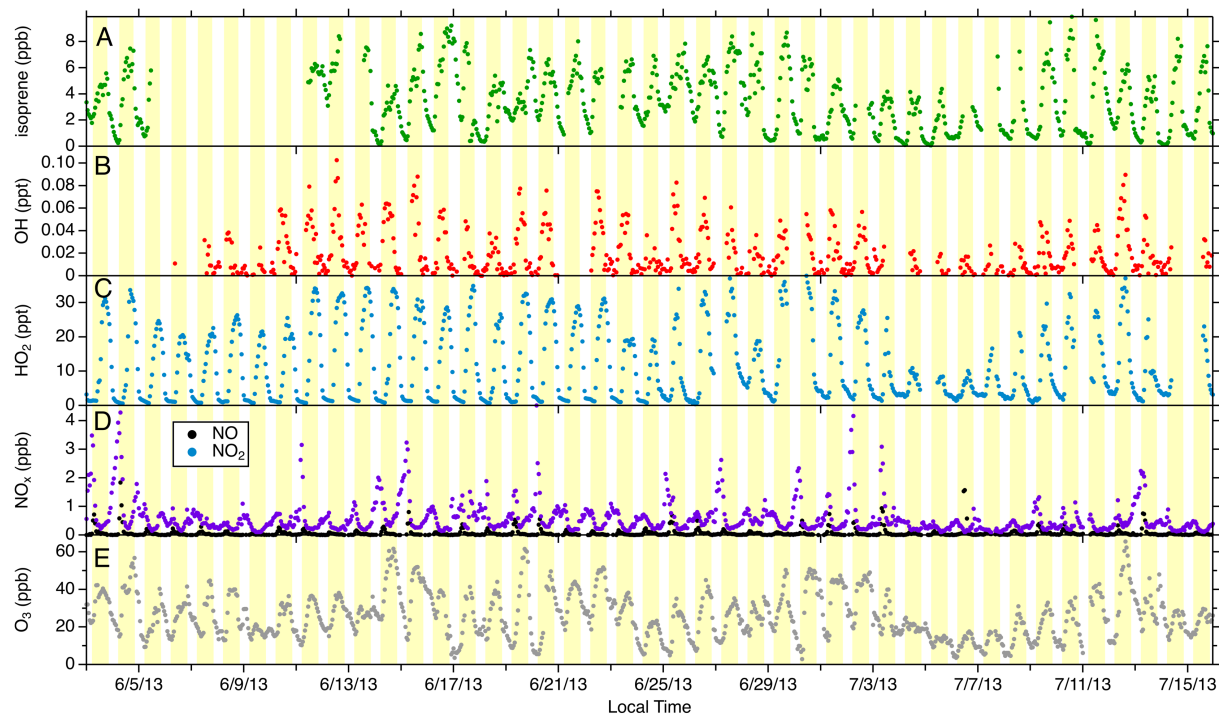

182

183 **Figure S10.** The time series of (A) isoprene, (B) OH, (C) HO<sub>2</sub>, (D) NO and NO<sub>2</sub>, and (E) O<sub>3</sub> during

184 the SOAS field campaign.



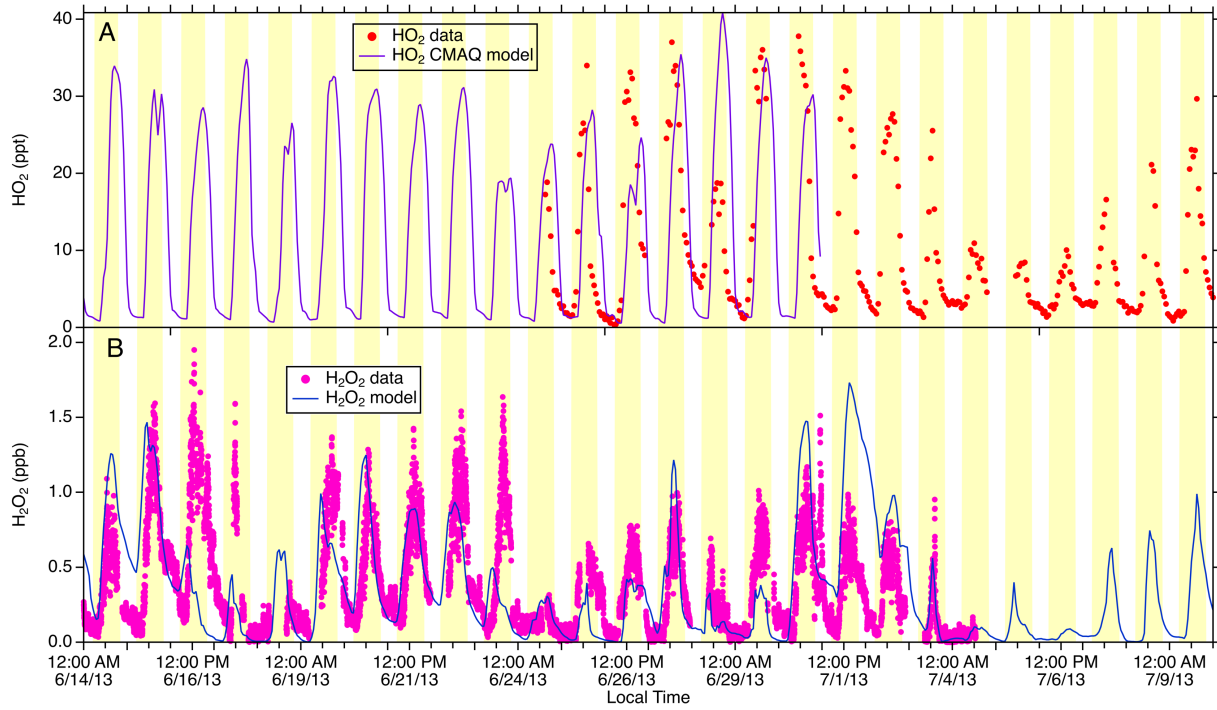

185

186 **Figure S11.** The time series of (A) measured and CMAQ modelled HO<sub>2</sub>, (B) measured and

187 modeled H<sub>2</sub>O<sub>2</sub> concentrations for the SOAS field campaign.

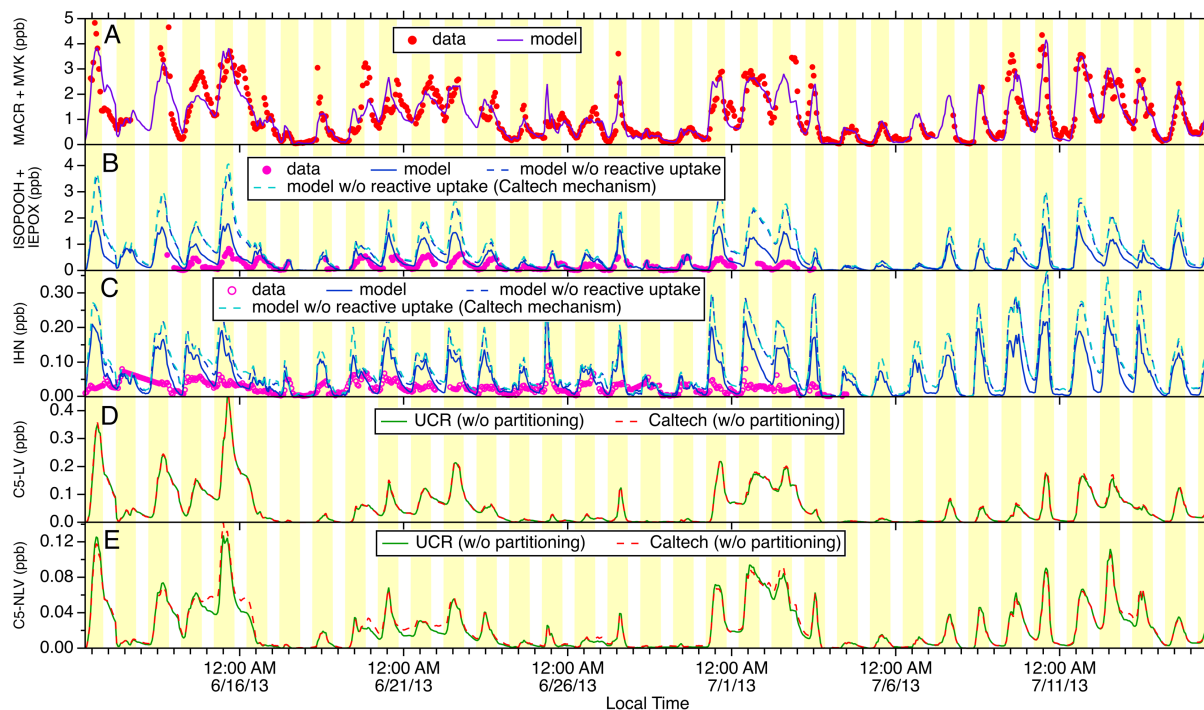

188

189 **Figure S12.** The time series of (A) measured and modeled MVK+MACR using UCR-ISOP; (B)  
 190 measured and modeled IEPOX+ISOPOOH using both the UCR-ISOP and Caltech mechanisms,  
 191 wherein for the UCR-ISOP simulations, the scenario considering IEPOX reactive uptake is also  
 192 shown; (C) measured and modeled IHN using both the UCR-ISOP and Caltech mechanisms,  
 193 wherein for the UCR-ISOP simulations, the scenario considering 1,2-IHN reactive uptake is also  
 194 shown; (D) modeled C5-LV; and (E) modeled C5-NLV. The comparative gas-phase simulations  
 195 between the UCR-ISOP and Caltech mechanisms suggest that the measurement-model  
 196 disagreement is not due to any specific mechanism, but rather a lack of understanding of processes.  
 197

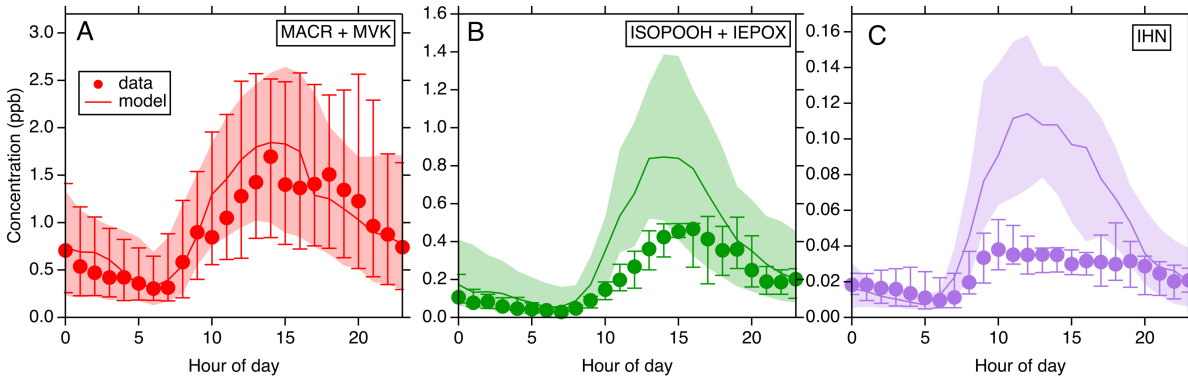

198

199 **Figure S13.** Measurement-simulation comparisons of the diurnal variations for (A) MACR +  
 200 MVK; (B) ISOPOOH + IEPOX; and (C) IHN. The error bars represent the 25<sup>th</sup> and 75<sup>th</sup> percentiles  
 201 of the measurements and the shaded areas represent the 25<sup>th</sup> and 75<sup>th</sup> percentiles of the simulations.  
 202 The simulations exhibit very good agreement for measured MACR + MVK (A), but over predict  
 203 ISOPOOH + IEPOX by a factor of  $\sim 1.8$  and IHN by a factor of 1.9 (average of median values).

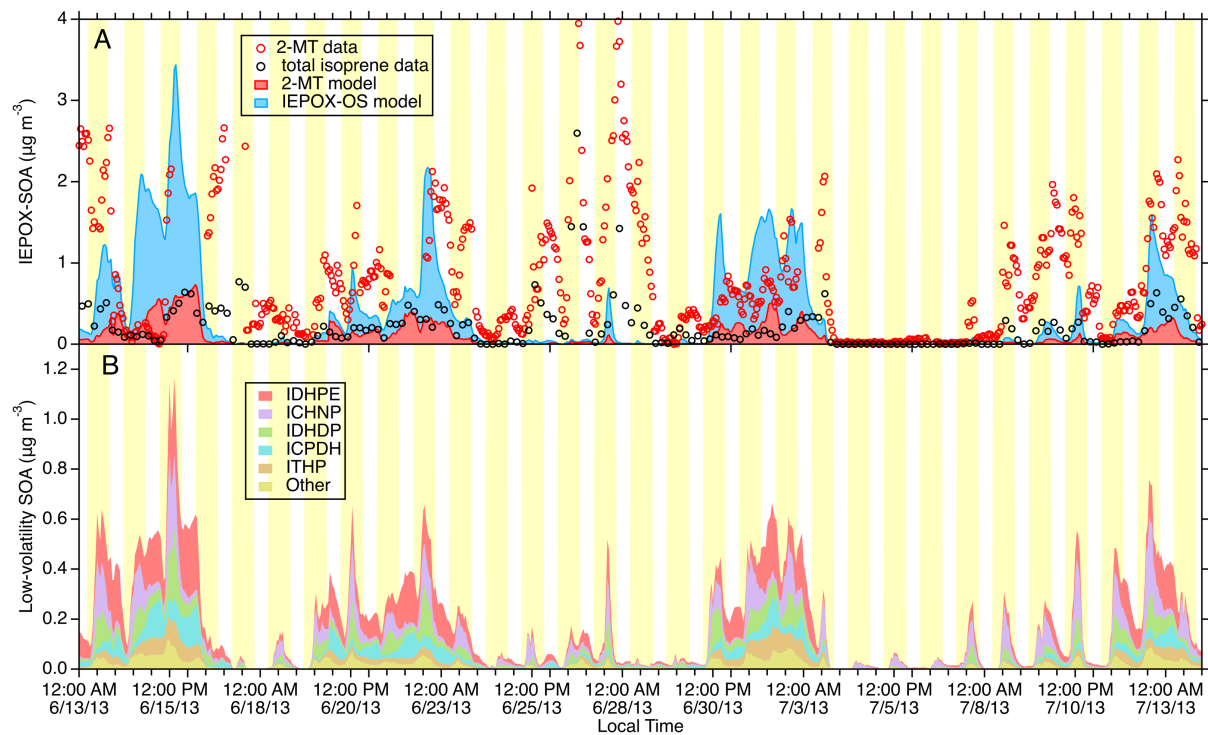

204

205 **Figure S14.** The time series of (A) measured (by FIGAERO-CIMS and GC×GC-MS) and  
 206 modelled IEPOX-derived SOA using the UCR-ISOP mechanism and (B) modelled isoprene SOA  
 207 from the low-volatility pathways.

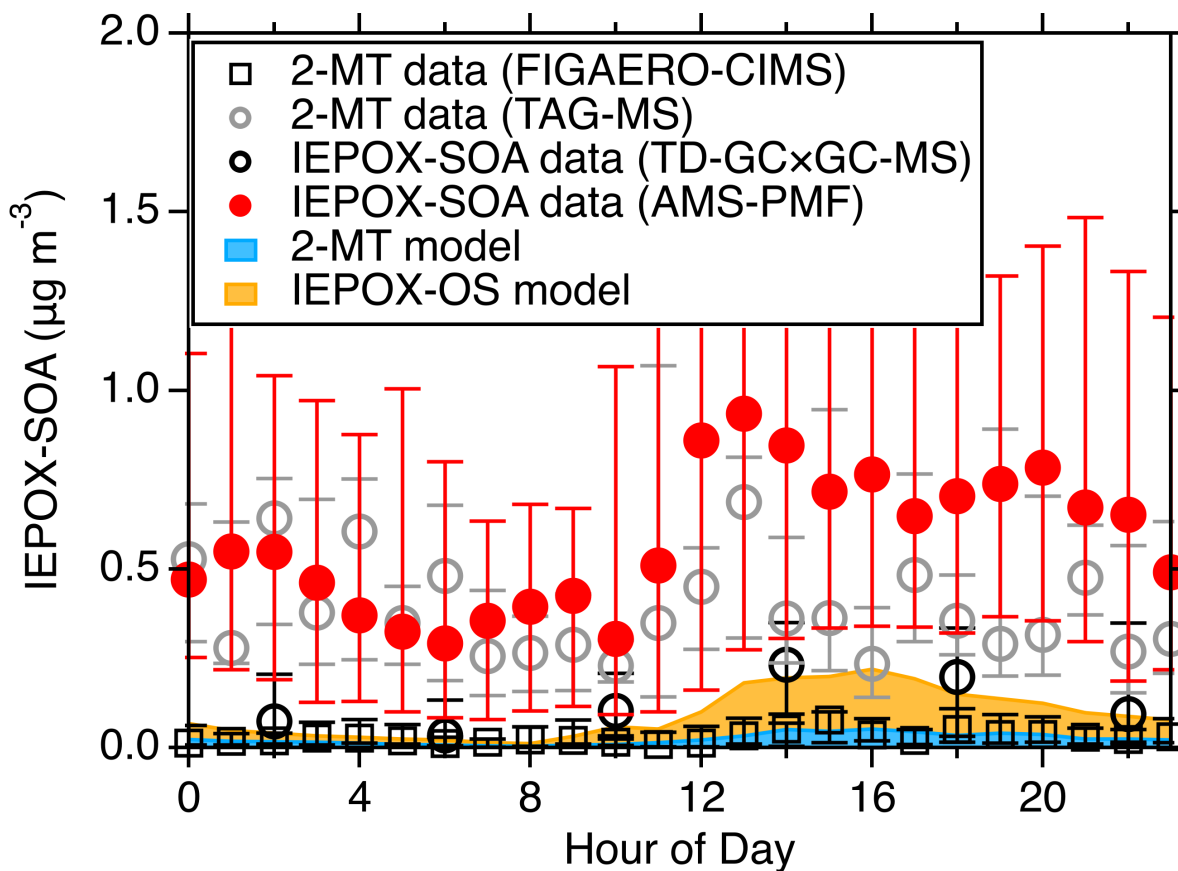

208

209 **Figure S15.** The diurnal trend of IEPOX-SOA comparison between the measurements and  
 210 simulations, reproduced from Fig. 5A, but including the TAG-MS measurements and the IEPOX-  
 211 SOA factor from AMS-PMF analysis.

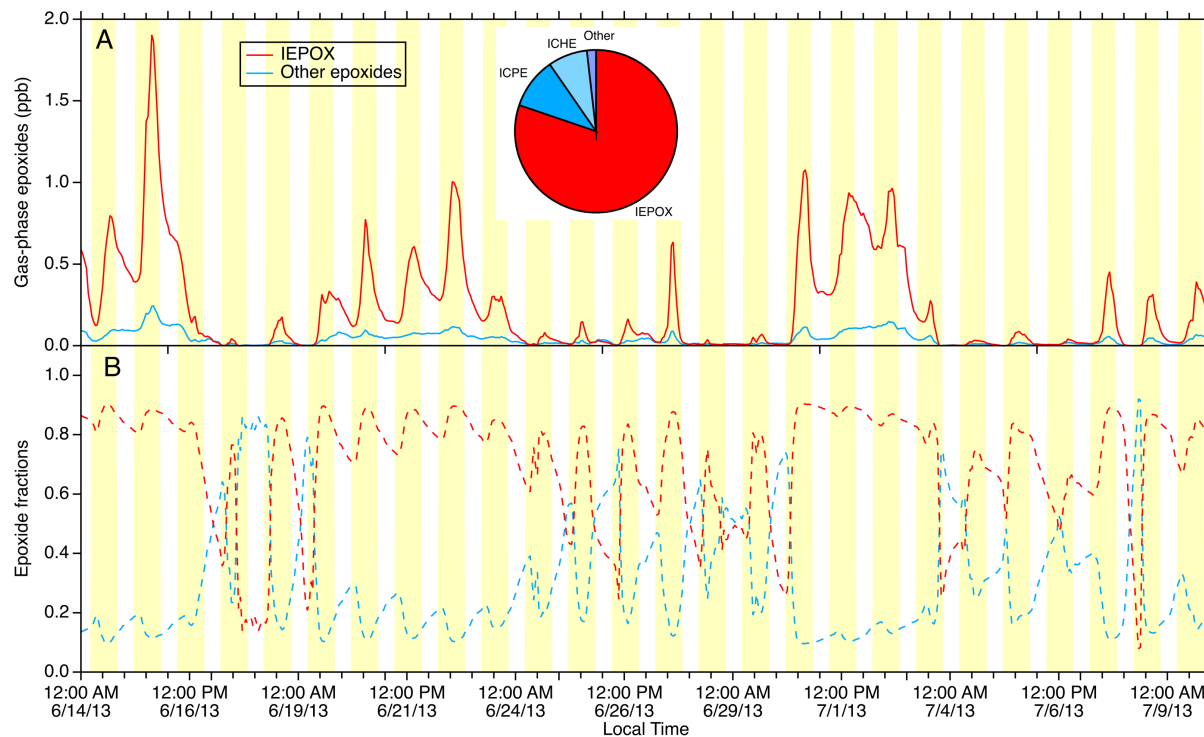

212

213 **Figure S16.** The time series of model predicted IEPOX and summed other epoxides for (A)

214 concentrations and (B) relative fractions. Note, IEPOX is the sum of both  $\beta$ - and  $\delta$ -IEPOX; the

215 summed other epoxides do not include IDHPE, which is considered a C5-LV species. The insert

216 pie chart shows the contributions of major epoxides for SOAS medians, where IEPOX account for

217 80%.

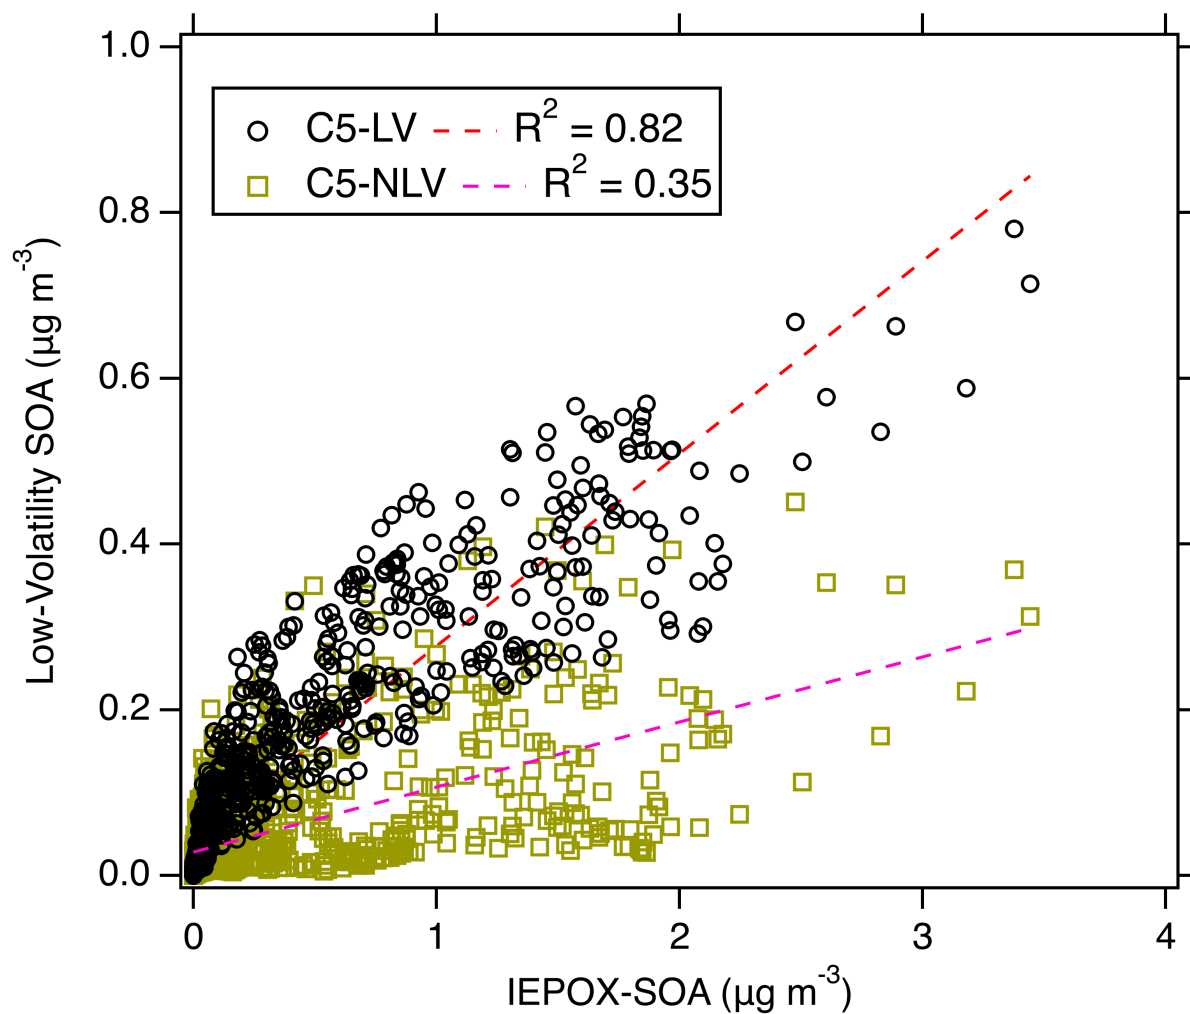

218

219 **Figure S17.** The correlation between the simulated SOA from IEPOX reactive uptake and those  
220 from low-volatility species (C5-LV and C5-NLV). The R2 values are 0.82 for C5-LV and 0.35 for  
221 C5-NLV.

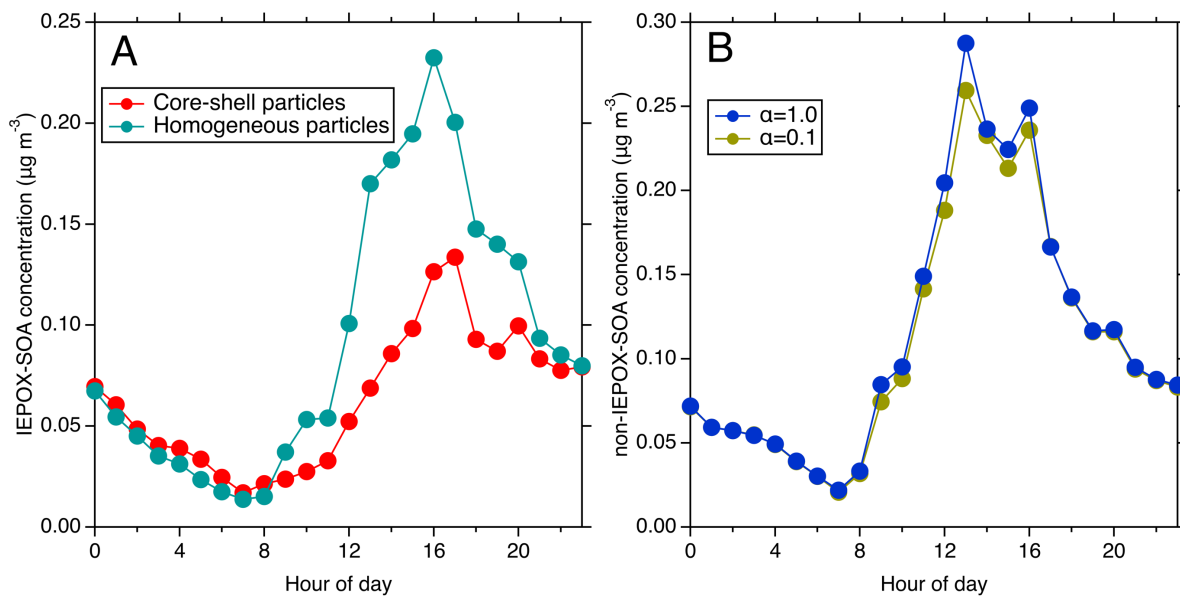

222  
 223 **Figure S18.** The sensitivity tests of (A) modelled IEPOX-SOA under assumptions of  
 224 homogeneous particles vs. core-shell particles, and (B) modelled non-IEPOX-SOA under  
 225 assumptions of  $\alpha = 1$  (without diffusion limitation) vs.  $\alpha = 0.1$  (with diffusion limitation). In (A),  
 226 the organic and inorganic mass concentrations from AMS data are used to derive particle's core  
 227 and shell thickness, with the assumption that the organic shell contains 10% of the aerosol-  
 228 associated liquid water content and the inorganic core 90%. The products of  $H_{\text{org}}$  (Henry's law  
 229 coefficient in the organic layer) and  $D_{\text{org}}$  (diffusion coefficient of IEPOX in the organic layer) are  
 230 extrapolated from experimental results in Zhang et al. (2018).



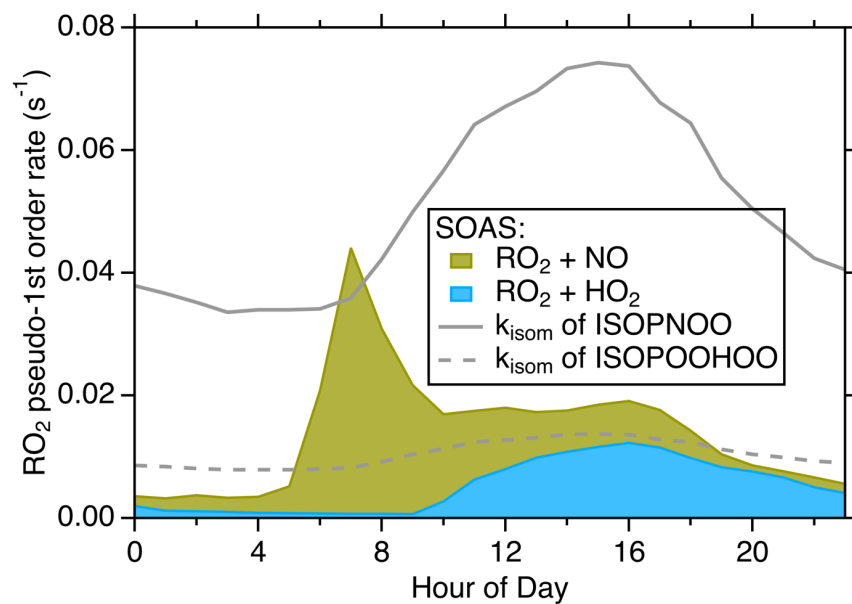

232

233 **Figure S19.** Pseudo-first order rates for  $\text{RO}_2$  bimolecular reactions with  $\text{NO}$  and  $\text{HO}_2$  during  
234 SOAS, in comparison with the unimolecular isomerization rate constants for ISOPNOO and  
235 ISOPOOHOO.

236  
237  
238  
239  
240  
241  
242  
243  
244  
245  
246  
247  
248  
249  
250  
251  
252  
253  
254  
255  
256  
257  
258  
259  
260  
261  
262  
263  
264  
265  
266  
267  
268  
269

## References

- Kamens, R. M., Zhang, H., Chen, E. H., Zhou, Y., Parikh, H. M., Wilson, R. L., Galloway, K. E., and Rosen, E. P.: Secondary organic aerosol formation from toluene in an atmospheric hydrocarbon mixture: Water and particle seed effects, *Atmospheric Environment*, 45, 2324-2334, 2011.
- Schmedding, R., Rasool, Q. Z., Zhang, Y., Pye, H. O. T., Zhang, H., Chen, Y., Surratt, J. D., Lopez-Hilfiker, F. D., Thornton, J. A., Goldstein, A. H., and Vizuete, W.: Predicting secondary organic aerosol phase state and viscosity and its effect on multiphase chemistry in a regional-scale air quality model, *Atmos. Chem. Phys.*, 20, 8201-8225, 10.5194/acp-20-8201-2020, 2020.
- Schwantes, R. H., Teng, A. P., Nguyen, T. B., Coggon, M. M., Crouse, J. D., St. Clair, J. M., Zhang, X., Schilling, K. A., Seinfeld, J. H., and Wennberg, P. O.: Isoprene NO<sub>3</sub> Oxidation Products from the RO<sub>2</sub> + HO<sub>2</sub> Pathway, *The Journal of Physical Chemistry A*, 119, 10158-10171, 10.1021/acs.jpca.5b06355, 2015.
- Thornton, J. A., Shilling, J. E., Shrivastava, M., D'Ambro, E. L., Zawadowicz, M. A., and Liu, J.: A Near-Explicit Mechanistic Evaluation of Isoprene Photochemical Secondary Organic Aerosol Formation and Evolution: Simulations of Multiple Chamber Experiments with and without Added NO<sub>x</sub>, *ACS Earth and Space Chemistry*, 4, 1161-1181, 10.1021/acsearthspacechem.0c00118, 2020.
- Zhang, H., Parikh, H. M., Bapat, J., Lin, Y.-H., Surratt, J. D., and Kamens, R. M.: Modelling of secondary organic aerosol formation from isoprene photooxidation chamber studies using different approaches, *Environmental Chemistry*, 10, 194-209, <https://doi.org/10.1071/EN13029>, 2013.
- Zhang, H., Rattanavaraha, W., Zhou, Y., Bapat, J., Rosen, E. P., Sexton, K. G., and Kamens, R. M.: A new gas-phase condensed mechanism of isoprene-NO<sub>x</sub> photooxidation, *Atmospheric Environment*, 45, 4507-4521, <https://doi.org/10.1016/j.atmosenv.2011.04.011>, 2011.
- Zhang, X., Cappa, C. D., Jathar, S. H., McVay, R. C., Ensberg, J. J., Kleeman, M. J., and Seinfeld, J. H.: Influence of vapor wall loss in laboratory chambers on yields of secondary organic aerosol, *Proceedings of the National Academy of Sciences*, 111, 5802-5807, doi:10.1073/pnas.1404727111, 2014.
- Zhang, Y., Chen, Y., Lambe, A. T., Olson, N. E., Lei, Z., Craig, R. L., Zhang, Z., Gold, A., Onasch, T. B., Jayne, J. T., Worsnop, D. R., Gaston, C. J., Thornton, J. A., Vizuete, W., Ault, A. P., and Surratt, J. D.: Effect of the Aerosol-Phase State on Secondary Organic Aerosol Formation from the Reactive Uptake of Isoprene-Derived Epoxydiols (IEPOX), *Environmental Science & Technology Letters*, 5, 167-174, 10.1021/acs.estlett.8b00044, 2018.
